# Supplementary material for: Investigating the formation of metal nitride complexes employing a tetradentate bis-carbene bis-phenolate ligand
Source: Royal Society of Chemistry journal article supplement (doi:10.1039/d4dt01765j), 2024-11-08
Supplement: d4dt01765j2.pdf [file d4dt01765j2.pdf]

## Supporting Information

### Investigating the formation of metal nitride complexes employing a tetradentate bis-carbene bis-phenolate ligand

Romain Kunert,<sup>a,b</sup> Diego Martelino,<sup>a</sup> Samyadeb Mahato,<sup>a</sup> Nick Hein,<sup>a</sup> Jason Pulfer,<sup>a</sup> Christian Philouze,<sup>b</sup> Oliver Jarjayes,<sup>b\*</sup> Fabrice Thomas,<sup>b\*</sup> Tim Storr<sup>a\*</sup>

<sup>a</sup>Department of Chemistry, Simon Fraser University, Burnaby, British Columbia, V5A 1S6, Canada. Email: tim\_storr@sfu.ca

<sup>b</sup>Univ. Grenoble Alpes, CNRS, DCM, F-38000, Grenoble, France. Email: Olivier.Jarjayes@univ-grenoble-alpes.fr; Fabrice.Thomas@univ-grenoble-alpes.fr

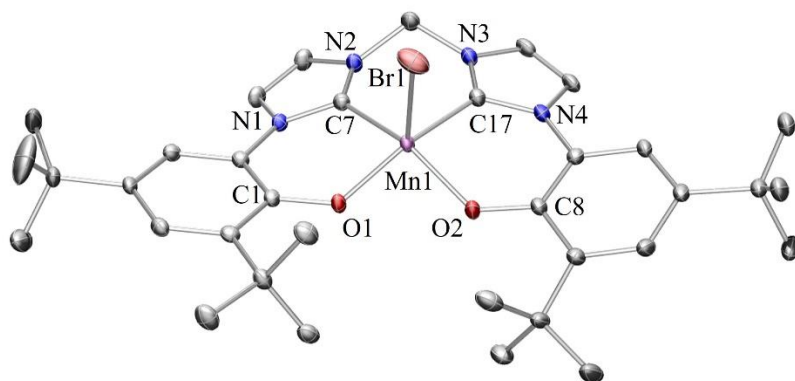

**Figure S1.** POV-ray representation of  $\text{MnL}^{\text{C2O2Br}}$ . Thermal ellipsoids shown at 50% probability level. Hydrogen atoms were omitted for clarity. Mn, pink; C, gray; O, red; N, blue. Select interatomic distances [Å] and angles [deg]: Mn(1)–O(1): 1.881(1), Mn(1)–O(2): 1.898(1), Mn(1)–C(7): 2.026(2), Mn(1)–C(17): 2.028(2), Mn(1)–Br(1): 2.5498(4).

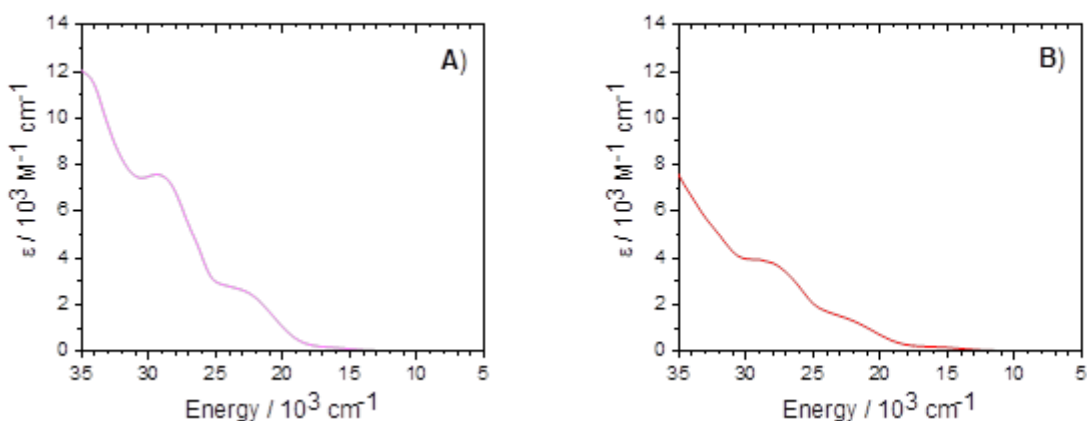

**Figure S2.** UV-vis-NIR spectra of  $\text{MnL}^{\text{C2O2}}(\text{Br})$  (A) and  $\text{MnL}^{\text{C2O2}}(\text{N}_3)$  (B) in  $\text{CH}_2\text{Cl}_2$ ;  $T = 298$  K.

**Table S1.** Crystal data and structure refinement for  $\text{MnL}^{\text{C2O2}}(\text{Br})$ ,  $\text{MnL}^{\text{C2O2}}(\text{N}_3)$  and  $[\text{H}_2\text{L}^{\text{C2O2}}(\text{N})]\text{Cl}$ .

| Compound                           | $\text{MnL}^{\text{C2O2}}(\text{Br})$                | $\text{MnL}^{\text{C2O2}}(\text{N}_3)$                                  | $[\text{H}_2\text{L}^{\text{C2O2}}(\text{N})]\text{Cl}$                                                                                                                |
|------------------------------------|------------------------------------------------------|-------------------------------------------------------------------------|------------------------------------------------------------------------------------------------------------------------------------------------------------------------|
| CCDC Number                        | 2359452                                              | 2359453                                                                 | 2359456                                                                                                                                                                |
| Formula                            | $\text{C}_{35}\text{H}_{46}\text{BrMnN}_4\text{O}_2$ | $\text{C}_{35}\text{H}_{46}\text{MnN}_{6.97}\text{Br}_{0.03}\text{O}_2$ | $\text{Cl}$ , $\text{C}_{35}\text{H}_{48}\text{N}_5\text{O}_2$ , $\text{H}_2\text{O}$ ,<br>(0.748) $\text{CH}_2\text{Cl}_2$ ,<br>(1.25) $\text{C}_2\text{H}_3\text{N}$ |
| $F_w$ [g.mol <sup>-1</sup> ]       | 689.61                                               | 653.47                                                                  | 739.08                                                                                                                                                                 |
| $T$ [K]                            | 296(2)                                               | 273(2)                                                                  | 210                                                                                                                                                                    |
| Morphology                         | needle                                               | blade                                                                   | prism                                                                                                                                                                  |
| Color                              | brown                                                | red                                                                     | yellow                                                                                                                                                                 |
| Crystal size [mm]                  | 1 x 0.1 x 1                                          | 0.04 x 0.07 x 0.37                                                      | 0.11 x 0.21 x 0.22                                                                                                                                                     |
| Crystal system                     | monoclinic                                           | monoclinic                                                              | triclinic                                                                                                                                                              |
| Space group                        | C 2/c                                                | P 2/n                                                                   | P-1                                                                                                                                                                    |
| $a$ [Å]                            | 30.477(2)                                            | 15.6595(7)                                                              | 8.1811(16)                                                                                                                                                             |
| $b$ [Å]                            | 15.0603(11)                                          | 9.0777(5)                                                               | 13.290(3)                                                                                                                                                              |
| $c$ [Å]                            | 20.2126(14)                                          | 25.7615(13)                                                             | 20.518(4)                                                                                                                                                              |
| $\alpha$ [°]                       | 90                                                   | 90                                                                      | 96.27(3)                                                                                                                                                               |
| $\beta$ [°]                        | 122.3273(18)                                         | 90.347(2)                                                               | 96.47(3)                                                                                                                                                               |
| $\gamma$ [°]                       | 90                                                   | 90                                                                      | 106.01(3)                                                                                                                                                              |
| Unit-cell volume [Å <sup>3</sup> ] | 7839.5(10)                                           | 3662.0(3)                                                               | 2107.6(8)                                                                                                                                                              |
| $Z$                                | 8                                                    | 4                                                                       | 2                                                                                                                                                                      |
| $D_x$ [g.cm <sup>-3</sup> ]        | 1.169                                                | 1.185                                                                   | 1.165                                                                                                                                                                  |
| $\mu$ [mm <sup>-1</sup> ]          | 1.387                                                | 0.429                                                                   | 0.226                                                                                                                                                                  |
| $F(000)$                           | 2880.0                                               | 1387.0                                                                  | 790.0                                                                                                                                                                  |

| Radiation                                                           | MoK $\alpha$<br>( $\lambda = 0.71073 \text{ \AA}$ ) | MoK $\alpha$<br>( $\lambda = 0.71073 \text{ \AA}$ ) | MoK $\alpha$<br>( $\lambda = 0.71073 \text{ \AA}$ ) |
|---------------------------------------------------------------------|-----------------------------------------------------|-----------------------------------------------------|-----------------------------------------------------|
| $\Theta$ range for data collection/ $^{\circ}$                      | 1.581 to 28.737                                     | 1.526 to 22.533                                     | 2.392 to 24.997                                     |
| Index ranges                                                        | $-41 \leq h \leq 41$                                | $-16 \leq h \leq 16$                                | $-9 \leq h \leq 9$                                  |
|                                                                     | $-20 \leq k \leq 20$                                | $-9 \leq k \leq 9$                                  | $-15 \leq k \leq 15$                                |
|                                                                     | $-27 \leq l \leq 27$                                | $-27 \leq l \leq 27$                                | $-24 \leq l \leq 24$                                |
| Total reflections                                                   | 165068                                              | 29267                                               | 33145                                               |
| Unique reflections                                                  | 10145                                               | 4778                                                | 7349                                                |
| Used reflections                                                    | 7774 ( $I > 2\sigma(I)$ )                           | 3777 ( $I > 2\sigma(I)$ )                           | 5498 ( $I > 2\sigma(I)$ )                           |
| Refined parameters                                                  | 400                                                 | 459                                                 | 588                                                 |
| Rint.                                                               | 0.0721                                              | 0.0583                                              | 0.0719                                              |
| R1                                                                  | 0.0382                                              | 0.0331                                              | 0.0642                                              |
| R(w) <sup>a</sup>                                                   | 0.0935                                              | 0.0768                                              | 0.1819                                              |
| Goodness of fit $S$                                                 | 1.042                                               | 1.018                                               | 1.088                                               |
| $\Delta\rho_{\min}/\Delta\rho_{\max}$ ( $e \cdot \text{\AA}^{-3}$ ) | -1.55/1.4                                           | -0.23/0.27                                          | -0.35/0.47                                          |

<sup>a</sup>Based on  $F^2$  where  $w = 1/[\sigma^2(\text{Fo}^2) + (0.0389\text{P})^2 + 14.4630\text{P}]$  where  $\text{P} = (\text{Fo}^2 + 2\text{Fc}^2)/3$  for **MnL<sup>C202</sup>Br**  
 $w = 1/[\sigma^2(\text{Fo}^2) + (0.1000\text{P})^2]$  where  $\text{P} = (\text{Fo}^2 + 2\text{Fc}^2)/3$  for **MnL<sup>C202</sup>(N<sub>3</sub>)**  
 $w = 1/[\sigma^2(\text{Fo}^2) + (0.0816\text{P})^2 + 1.4607\text{P}]$  where  $\text{P} = (\text{Fo}^2 + 2\text{Fc}^2)/3$  for **[H<sub>2</sub>L<sup>C202</sup>(N)]Cl**  
 $w = 1/[\sigma^2(\text{Fo}^2) + (0.1062\text{P})^2 + 2.1078\text{P}]$  where  $\text{P} = (\text{Fo}^2 + 2\text{Fc}^2)/3$  for **1**

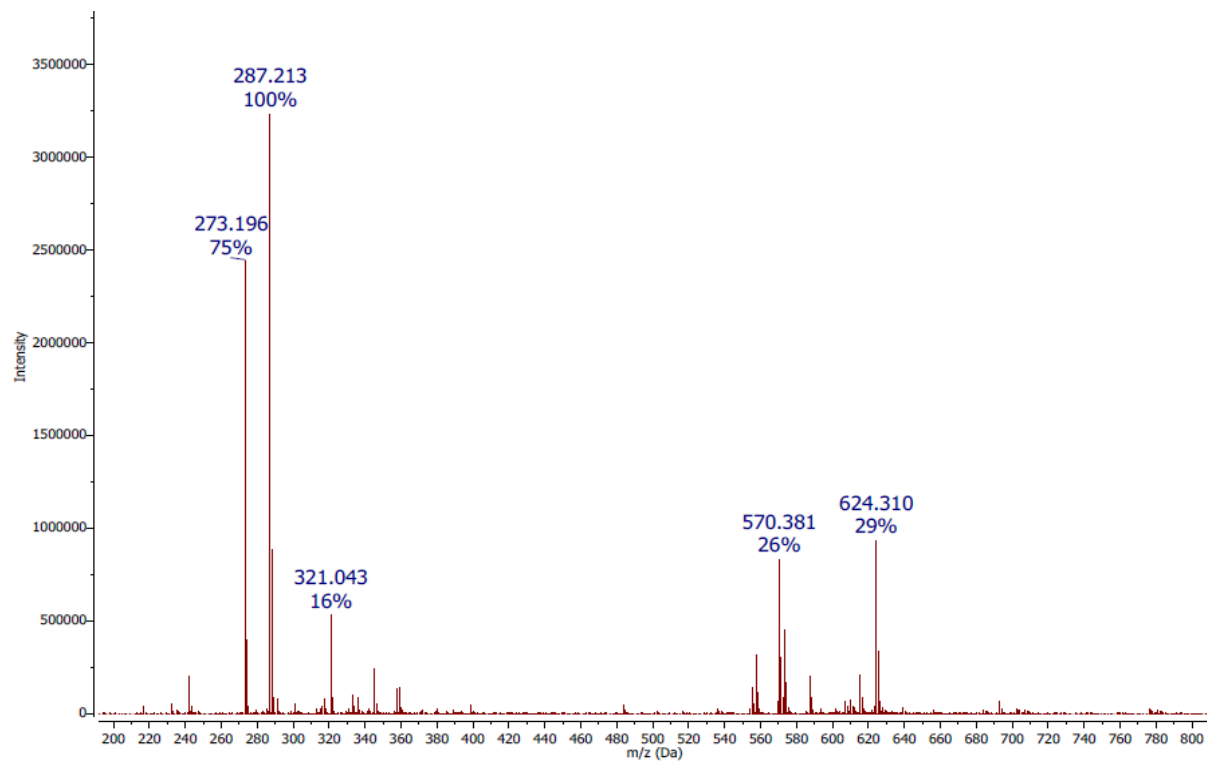

**Figure S3.** Positive mode ESI-MS analysis of the nitride exchange reaction between **Mnsalen(N)** and **MnL<sup>C2O2</sup>(Br)** in CH<sub>3</sub>CN.

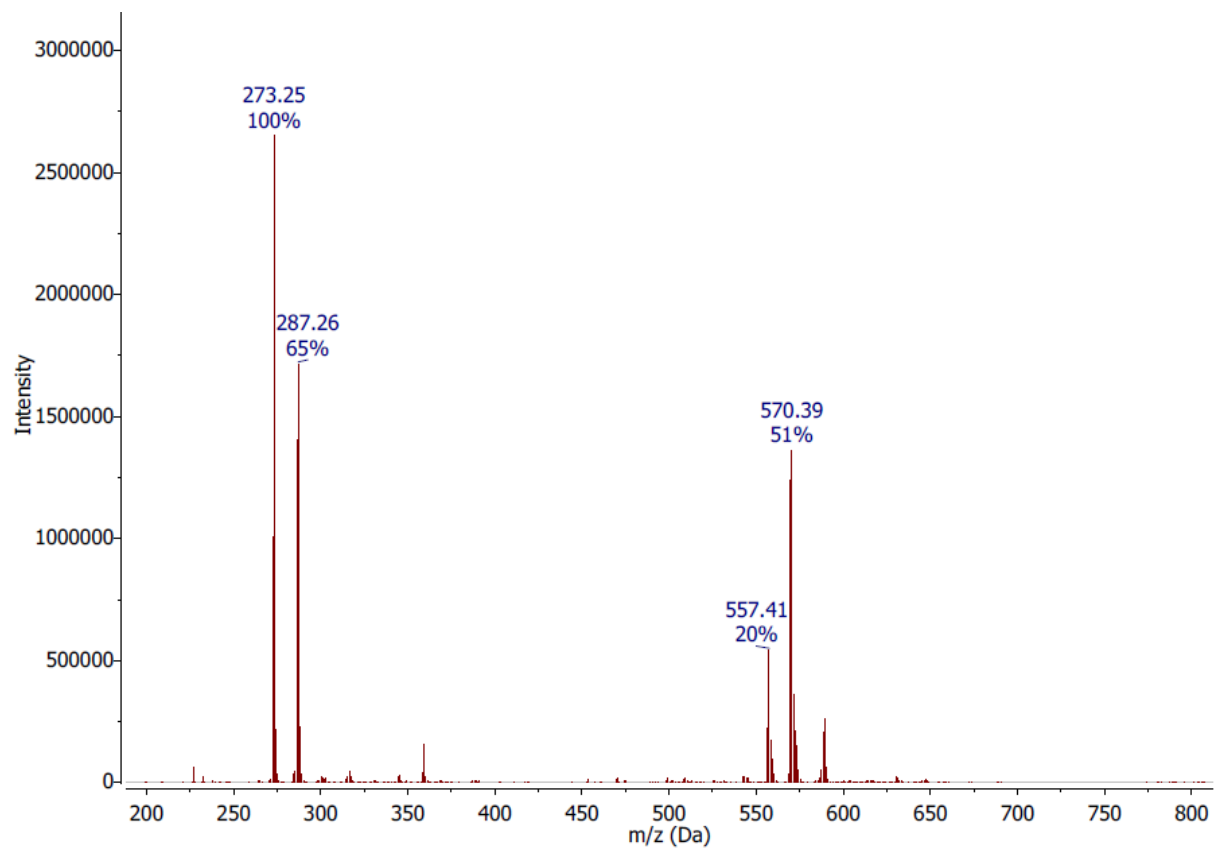

**Figure S4.** Positive mode ESI-MS analysis of a diethyl ether solution of the insertion reaction after washing with 10% HCl and EDTA.

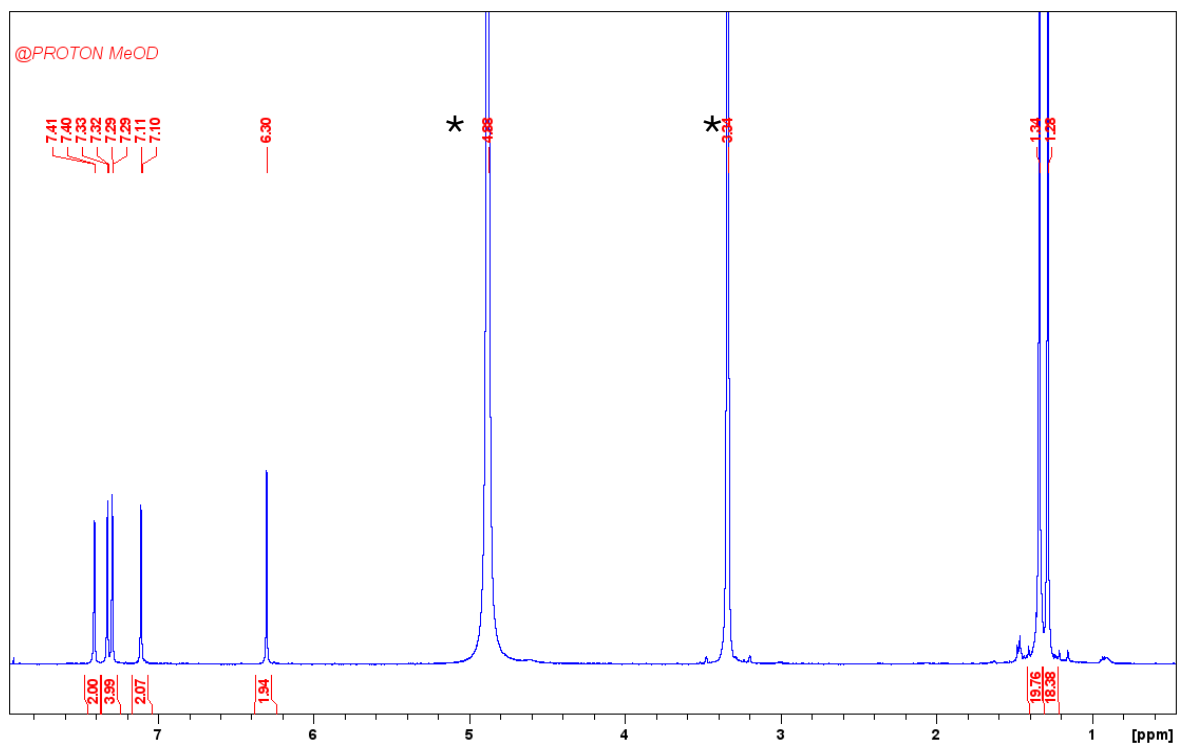

**Figure S5.** <sup>1</sup>H NMR spectrum of N-insertion product  $[\text{H}_2\text{L}^{\text{C}2\text{O}_2(\text{N})}]\text{Cl}$  in  $\text{CD}_3\text{OD}$ . Residual solvent from recrystallization marked with asterisks.

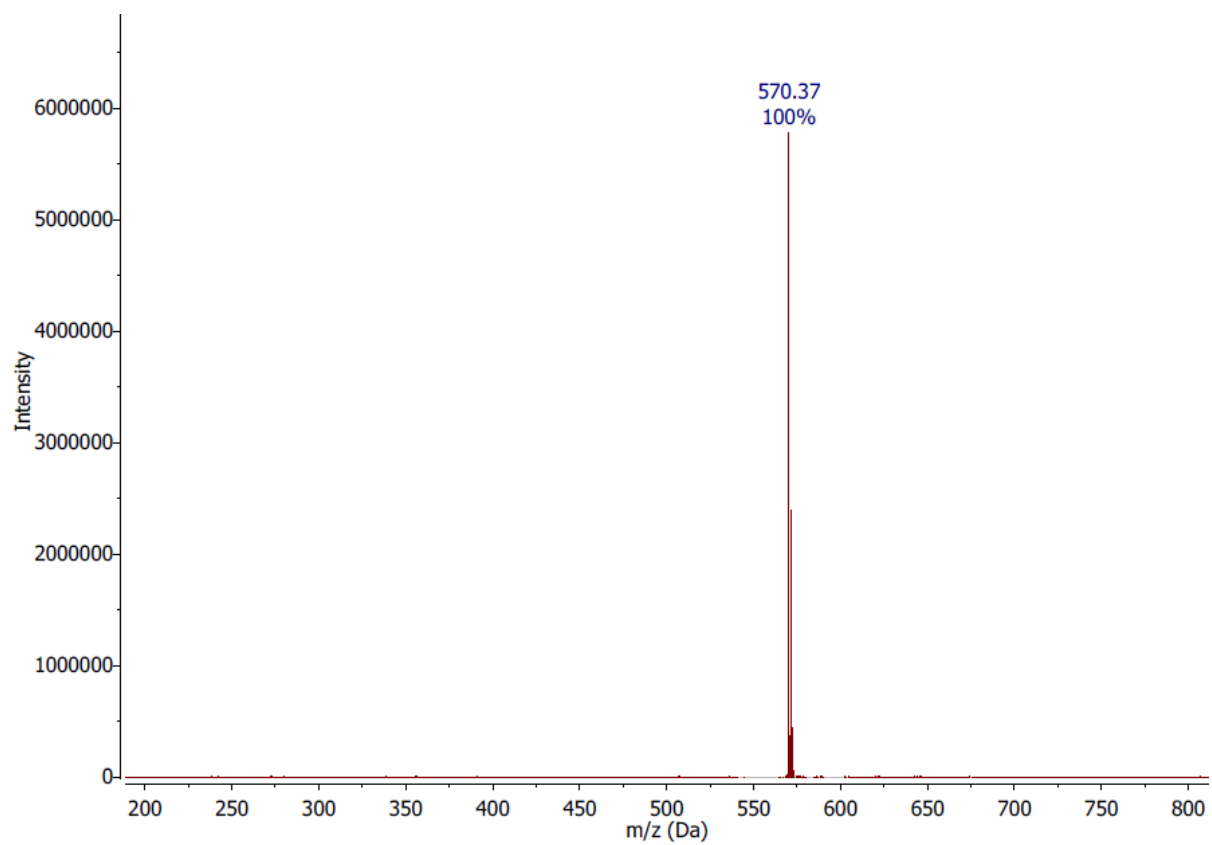

**Figure S6.** Positive mode ESI-MS of the N-insertion product  $[\text{H}_2\text{L}^{\text{C}2\text{O}2(\text{N})}]\text{Cl}$  after recrystallization.

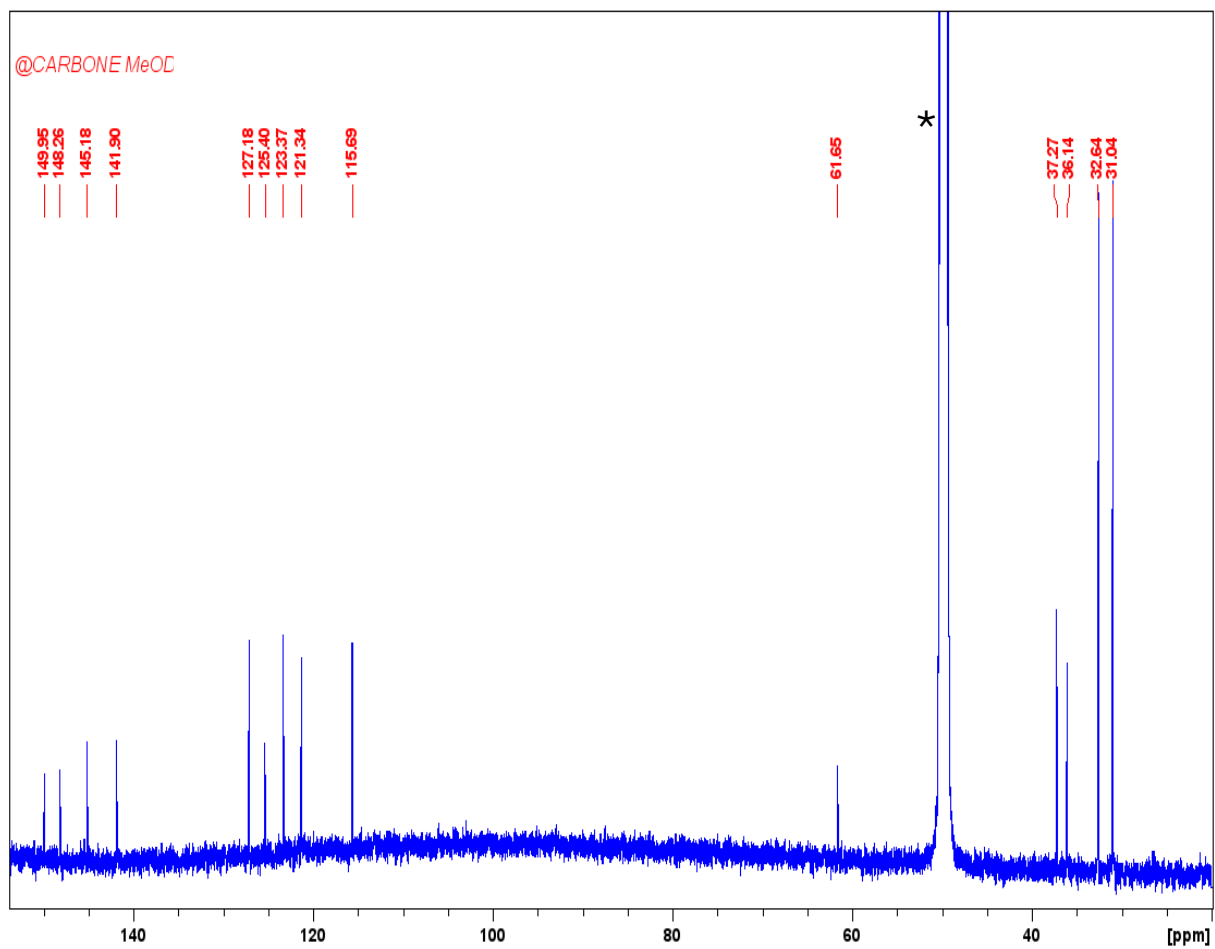

**Figure S7.**  $^{13}\text{C}$  NMR spectrum of N-insertion product  $[\text{H}_2\text{L}^{\text{C}2\text{O}2}(\text{N})]\text{Cl}$  in  $\text{CD}_3\text{OD}$ . Residual solvent from recrystallization marked with asterisks.



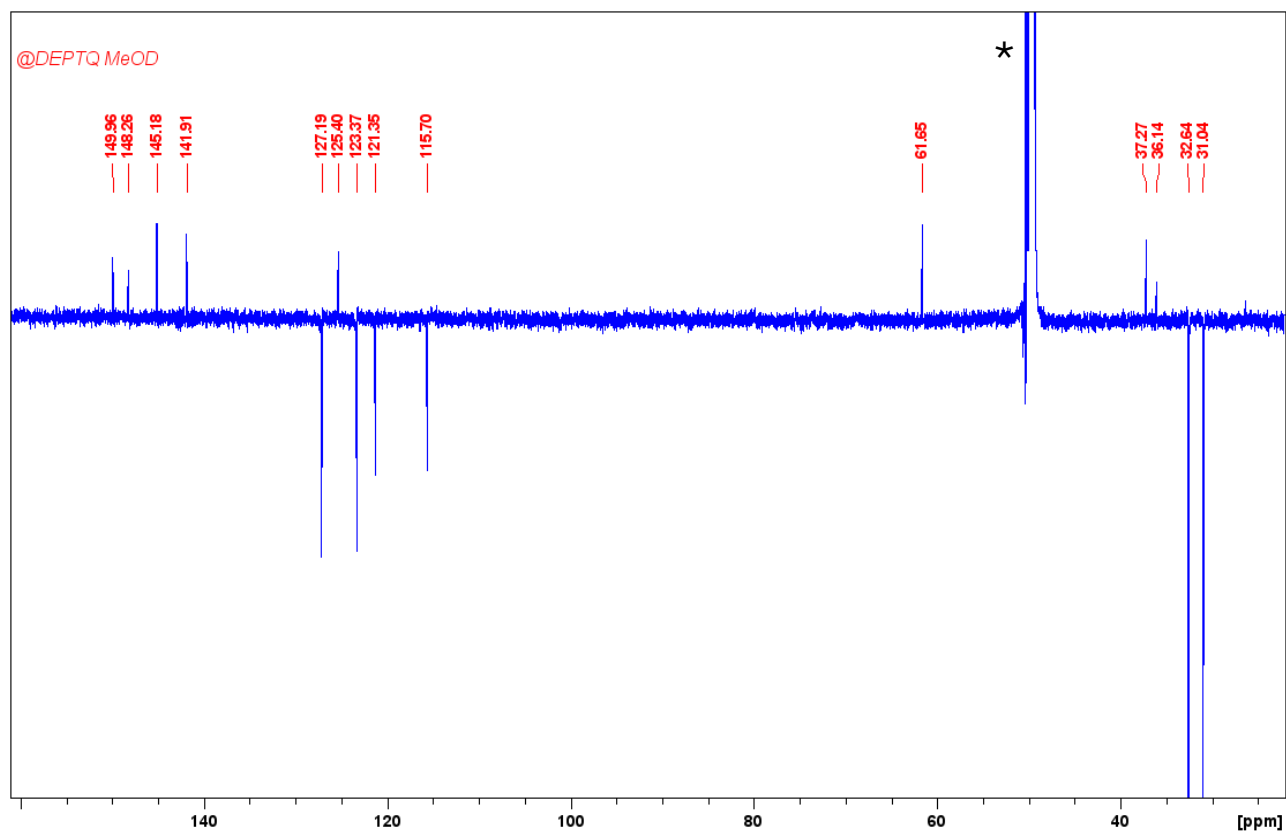

**Figure S8.**  $^{13}\text{C}$  DEPT NMR spectrum of N-insertion product  $[\text{H}_2\text{L}^{\text{C}2\text{O}2}(\text{N})]\text{Cl}$  in  $\text{CD}_3\text{OD}$ . Residual solvent from recrystallization marked with asterisks.

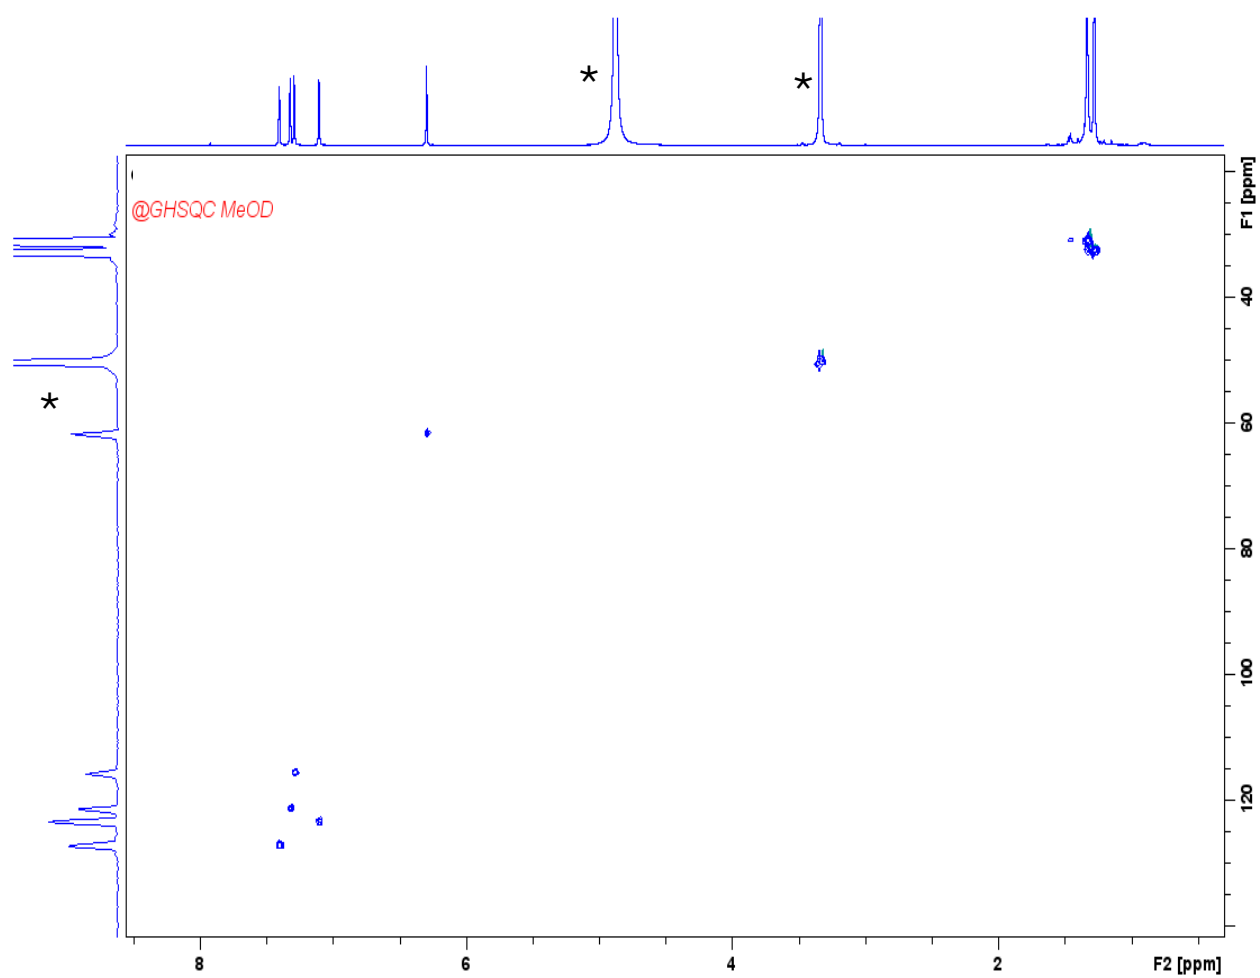

**Figure S9.**  $^1\text{H}$ - $^{13}\text{C}$  gHSQC NMR spectrum of N-insertion product  $[\text{H}_2\text{L}^{\text{C}2\text{O}2}(\text{N})]\text{Cl}$  in  $\text{CD}_3\text{OD}$ . Residual solvent from recrystallization marked with asterisks.

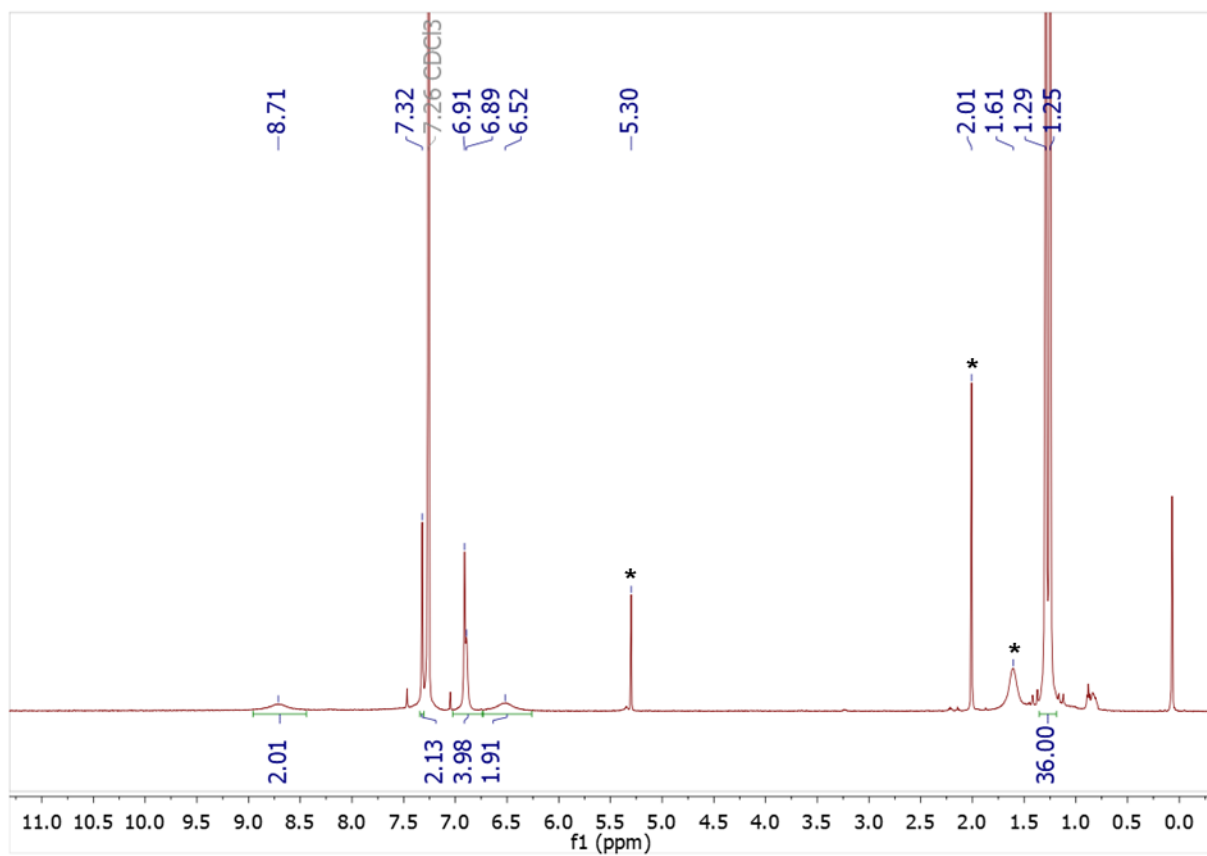

**Figure S10.**  $^1\text{H}$  NMR spectrum of N-insertion product  $[\text{H}_2\text{L}^{\text{C}2\text{O}_2(\text{N})}]\text{Cl}$  in  $\text{CDCl}_3$ . Residual solvent from recrystallization marked with asterisks.

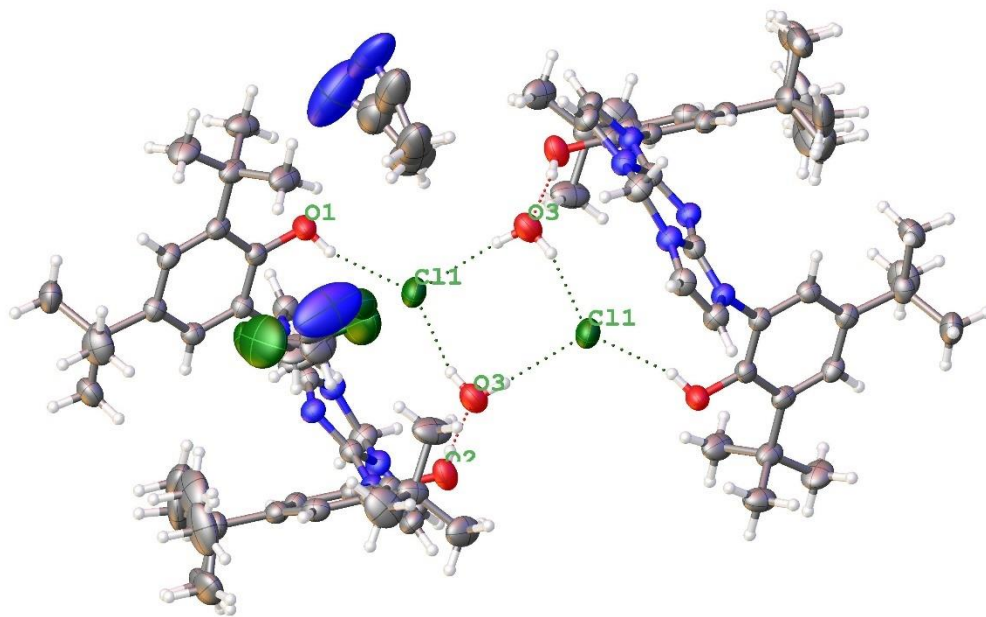

**Figure S11.** Hydrogen bond network in [H<sub>2</sub>L<sup>C2O2(N)</sup>]<sup>+</sup>Cl<sup>-</sup>.

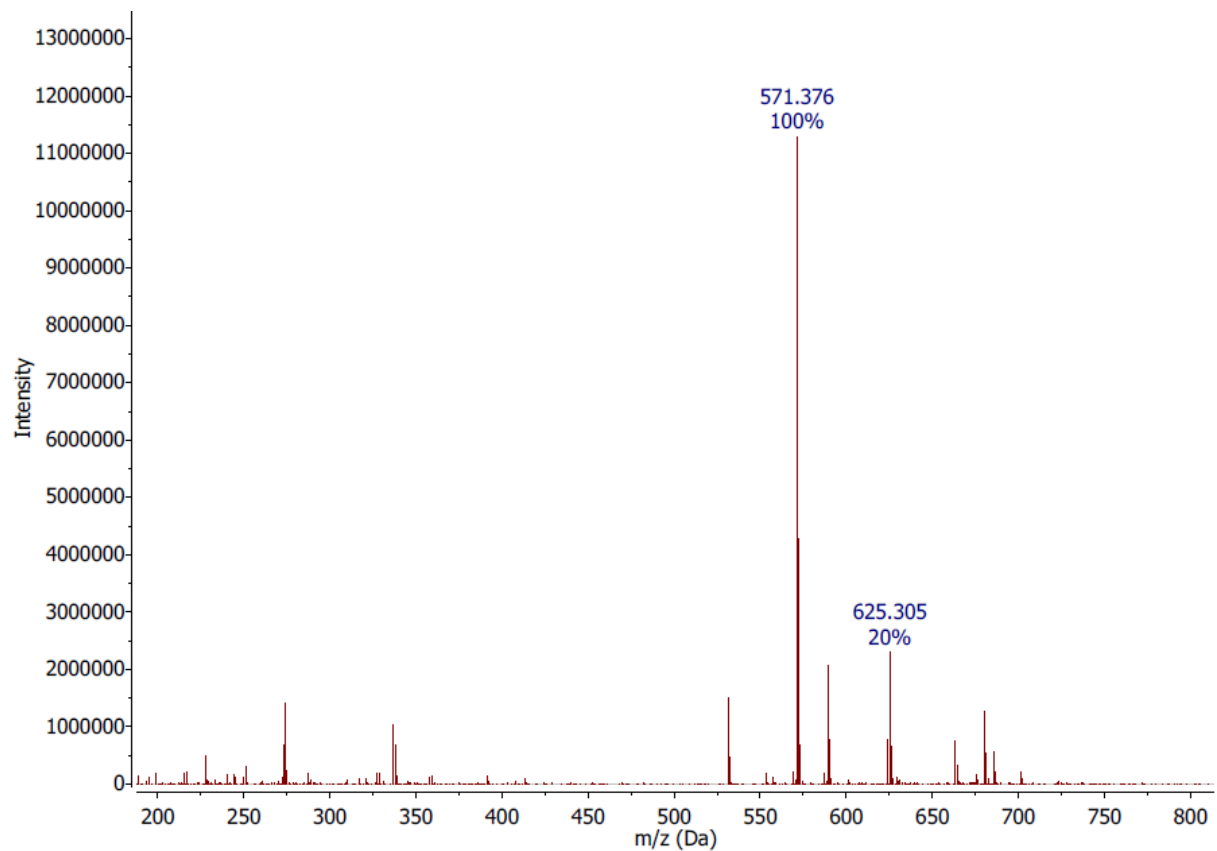

**Figure S12.** Positive mode ESI-MS analysis of the nitride exchange reaction between **Mnsalen**(<sup>15</sup>N) and **MnL**<sup>C2O2</sup>(Br) in CH<sub>3</sub>CN.

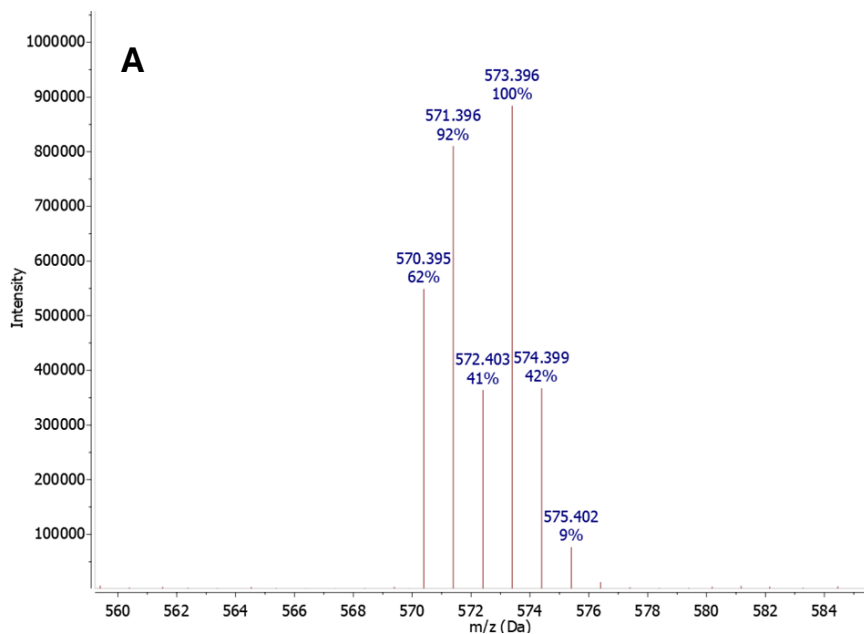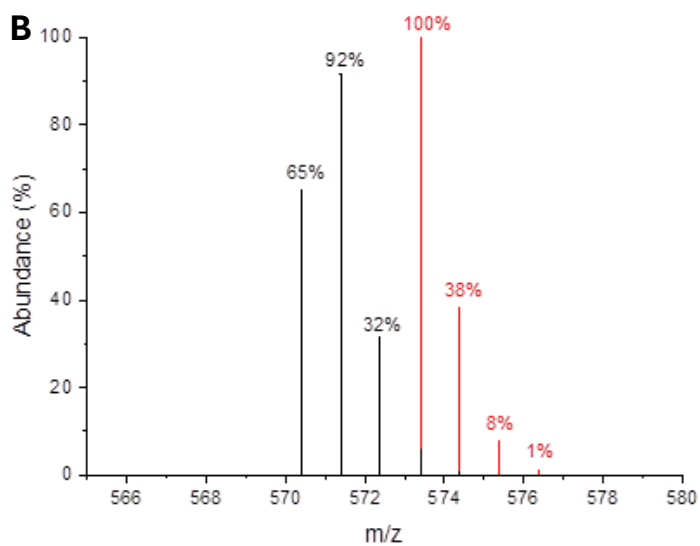

**Figure S13.** (A) Positive mode ESI-MS analysis of the photolysis of  $\text{MnL}^{\text{C2O2}}(^{14}/^{15}\text{N}_3)$  ( $\lambda_{\text{ex}} = 312 \text{ nm}$ ). (B) Predicted isotopic pattern for N-inserted ligand product (black) and O-inserted ligand product (red).

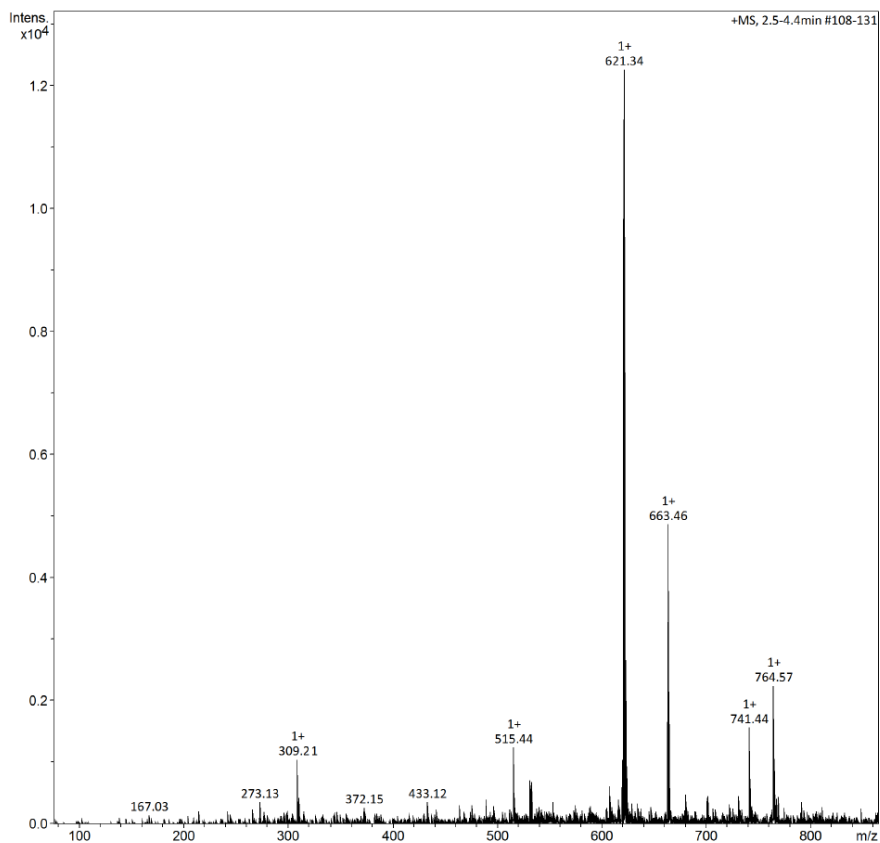

**Figure S14.** Positive mode ESI-MS analysis of  $\text{CrL}^{\text{C}2\text{O}2(\text{N})}$ .

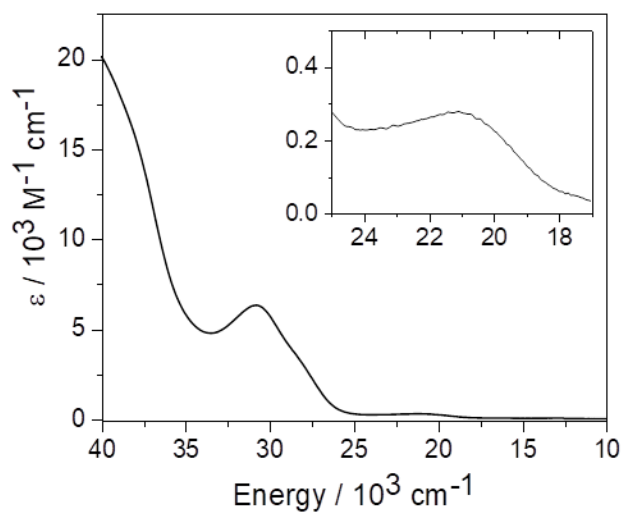

**Figure S15.** UV-vis-NIR spectra of a  $\text{CH}_2\text{Cl}_2$  solution of  $\text{CrL}^{\text{C}2\text{O}2(\text{N})}$ .  $T = 298$  K. The observable  $d \rightarrow d$  transition is highlighted in the inset.

**Table S2.** Crystal data and structure refinement for **CrL<sup>C2O2</sup>(N)**.

| Compound                                                           | CrL <sup>C2O2</sup> (N)                                         |
|--------------------------------------------------------------------|-----------------------------------------------------------------|
| CCDC number                                                        | 2359455                                                         |
| Formula                                                            | C <sub>35</sub> H <sub>46</sub> CrN <sub>5</sub> O <sub>2</sub> |
| <i>F<sub>w</sub></i> [g.mol <sup>-1</sup> ]                        | 620.77                                                          |
| <i>T</i> [K]                                                       | 296.15                                                          |
| Morphology                                                         | Prism                                                           |
| Color                                                              | Orange                                                          |
| Crystal size [mm]                                                  | 0.14 x 0.33 x 0.45                                              |
| Crystal system                                                     | monoclinic                                                      |
| Space group                                                        | -P2 <sub>1</sub> /c                                             |
| <i>a</i> [Å]                                                       | 15.7083(10)                                                     |
| <i>b</i> [Å]                                                       | 12.5593(9)                                                      |
| <i>c</i> [Å]                                                       | 16.5802(11)                                                     |
| $\alpha$ [°]                                                       | 90                                                              |
| $\beta$ [°]                                                        | 96.354(2)                                                       |
| $\gamma$ [°]                                                       | 90                                                              |
| Unit-cell volume [Å <sup>3</sup> ]                                 | 3250.9(4)                                                       |
| <i>Z</i>                                                           | 4                                                               |
| <i>D<sub>x</sub></i> [g.cm <sup>-3</sup> ]                         | 1.268                                                           |
| $\mu$ [mm <sup>-1</sup> ]                                          | 0.391                                                           |
| F(000)                                                             | 1324.0                                                          |
| Radiation                                                          | MoK $\alpha$<br>( $\lambda$ = 0.71073)                          |
| $\Theta$ range for data collection/°                               | 2.04 to 30.59<br>-22 $\leq$ h $\leq$ 22                         |
| Index ranges                                                       | -17 $\leq$ k $\leq$ 17<br>-23 $\leq$ l $\leq$ 23                |
| Total reflections                                                  | 93516                                                           |
| Unique reflections                                                 | 9981                                                            |
| Used reflections                                                   | 8454 (I>2 $\sigma$ (I))                                         |
| Refined parameters                                                 | 400                                                             |
| Rint.                                                              | 0.0392                                                          |
| R1                                                                 | 0.0337                                                          |
| R( <i>w</i> ) <sup>a</sup>                                         | 0.0962                                                          |
| Goodness of fit <i>S</i>                                           | 1.026                                                           |
| $\Delta\rho_{\min}/\Delta\rho_{\max}$ (e $\cdot$ Å <sup>-3</sup> ) | -0.42/0.71                                                      |

<sup>a</sup>Based on  $F^2$  where  $w = 1/[s^2(\text{Fo}^2)+(0.1\text{P})^2]$  where  $\text{P}=(\text{Fo}^2+2\text{Fc}^2)/3$  for **CrL<sup>C2O2</sup>N**

$w = 1/[s^2(\text{Fo}^2)+(0.2000\text{P})^2]$  where  $\text{P}=(\text{Fo}^2+2\text{Fc}^2)/3$  for **[3CrL<sup>C2O2</sup>( $\mu$ -N)<sub>2</sub>]<sup>+</sup>**



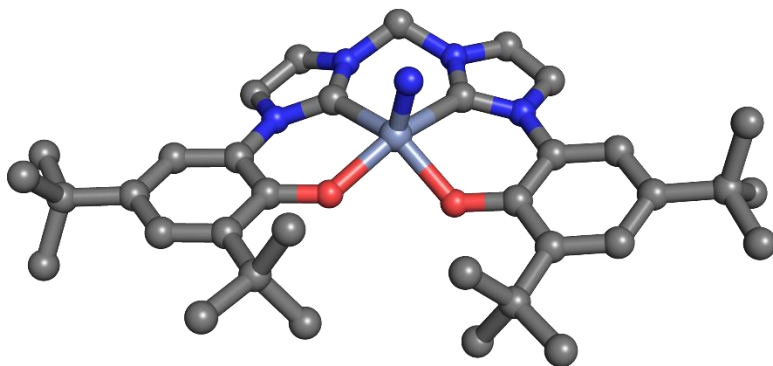

**Figure S16.** Predicted structure for the neutral  $\text{CrL}^{\text{C2O2}}(\text{N})$  complex. See Experimental Section for calculation details.

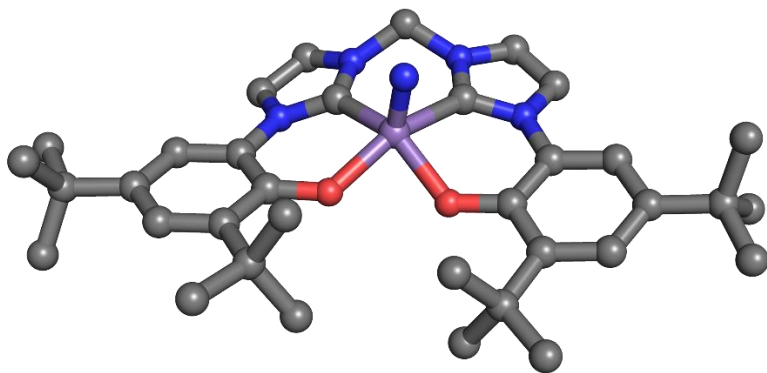

**Figure S17.** Predicted structure for the neutral  $\text{MnL}^{\text{C2O2}}(\text{N})$  complex. See Experimental Section for calculation details.

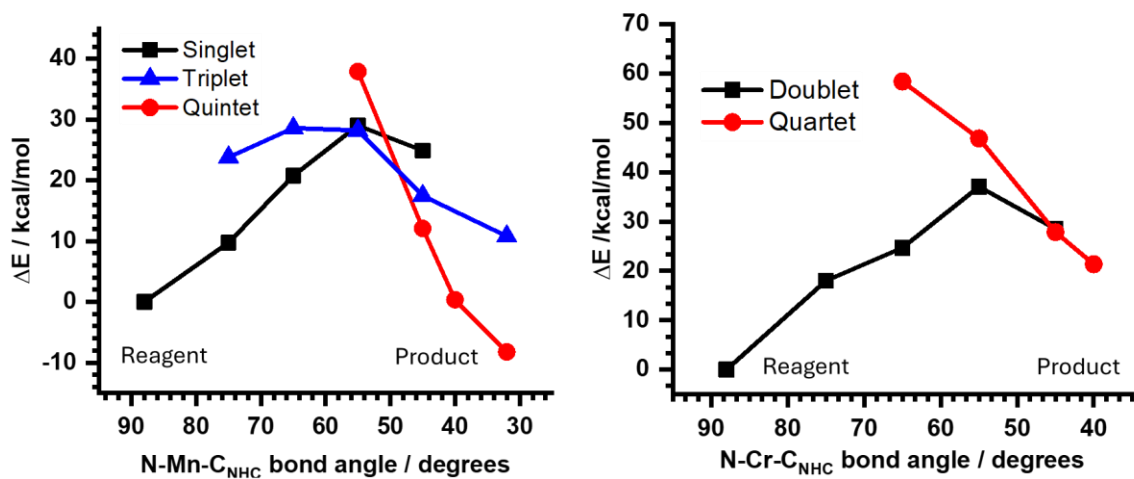

**Figure S18.** Potential energy surface (PES) for the nitride insertion reaction of  $\text{MnL}^{\text{C2O2}}(\text{N})$  (Left) and  $\text{CrL}^{\text{C2O2}}(\text{N})$  (Right). X-axis indicates change in Carbene-M-nitride bond angle from *ca.* 90° towards the transition state and finally inserted product.

**Table S3.** Relative spin state energetics of the <sup>1</sup>TS and <sup>3</sup>TS for the predicted nitride insertion reaction for  $\text{MnL}^{\text{C2O2}}(\text{N})$ .

| Theory Level                              | <sup>1</sup> TS Relative Energy (kcal/mol) | <sup>3</sup> TS Relative Energy (kcal/mol) |
|-------------------------------------------|--------------------------------------------|--------------------------------------------|
| Opt: uB3LYP-GD3/6-31g* SP: uBP86-GD3/TZVP | 0                                          | -1.93                                      |
| Opt/SP: wB97XD/TZVP                       | 0                                          | -6.89                                      |
| Opt/SP: UMO6/TZVP                         | 0                                          | -14.33                                     |
| Opt/SP: PBE-GD3/TZVP                      | 0                                          | -8.17                                      |

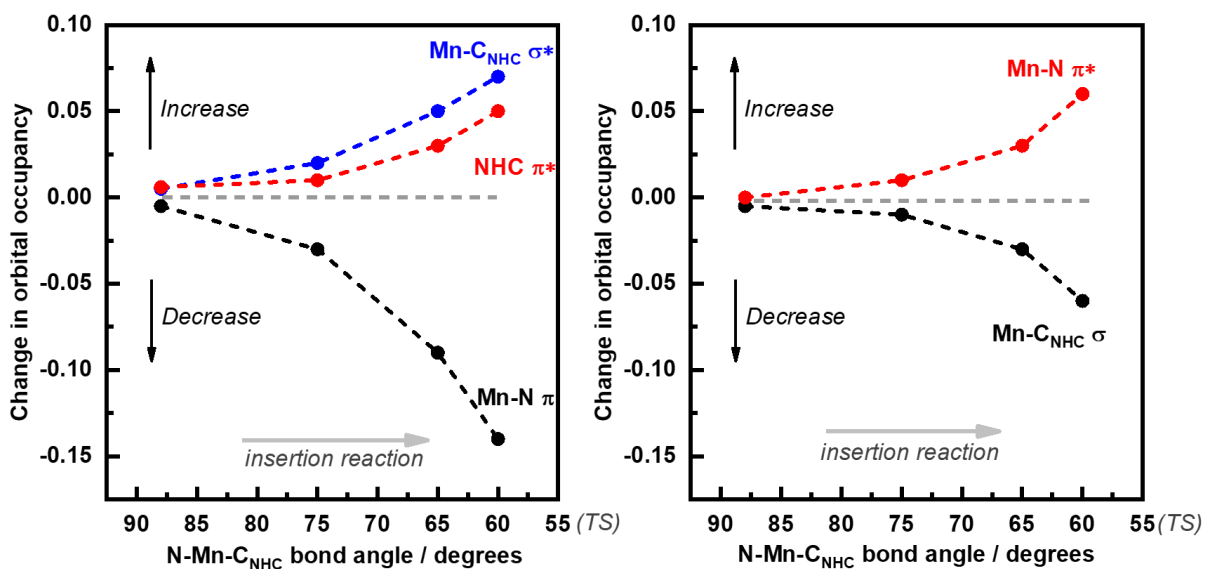

**Figure S19.** Predicted change in orbital occupancy for  $\text{MnL}^{\text{C2O2}}(\text{N})$  as the N-Mn-C<sub>NHC</sub> bond angle is decreased from the equilibrium structure (ca. 90°) to the TS (ca. 60°) during the nitride insertion reaction. (Left)  $\pi$  Mn $\equiv$ N donation, and (Right)  $\sigma$  Mn-NHC donation.

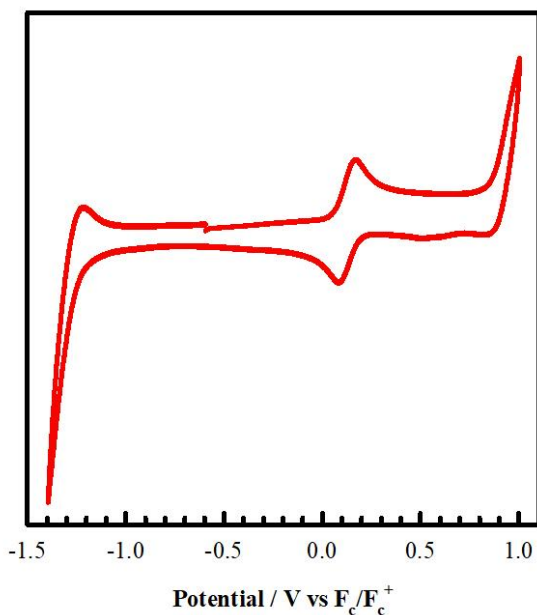

**Figure S20.** Cyclic voltammogram of  $\text{CrL}^{\text{C2O2}}(\text{N})$  showing the full scan range. Conditions: 0.5 mM complex,  $\text{CH}_2\text{Cl}_2$ , 0.1 M TBAP, scan rate = 100 mV/s, 298 K.

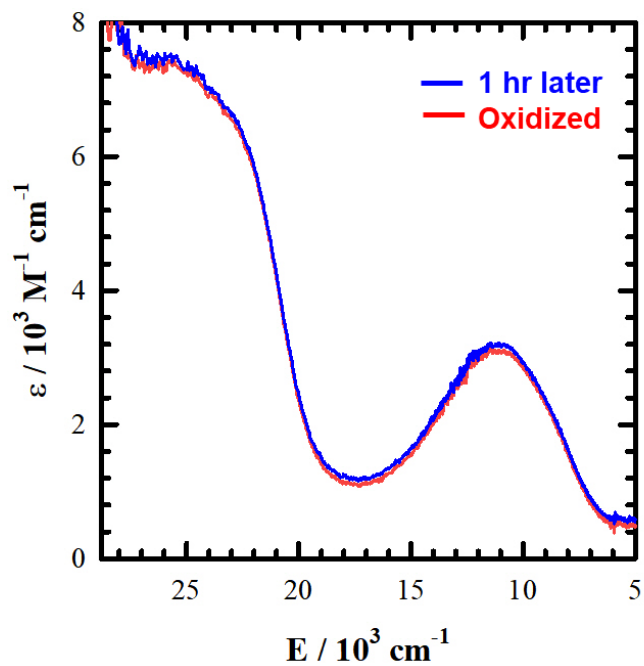

**Figure S21.** Stability of  $[\text{CrL}^{\text{C}2\text{O}2}(\text{N})]^+$  over a one hour period. Conditions: 0.45 mM,  $\text{CH}_2\text{Cl}_2$ , 253 K.

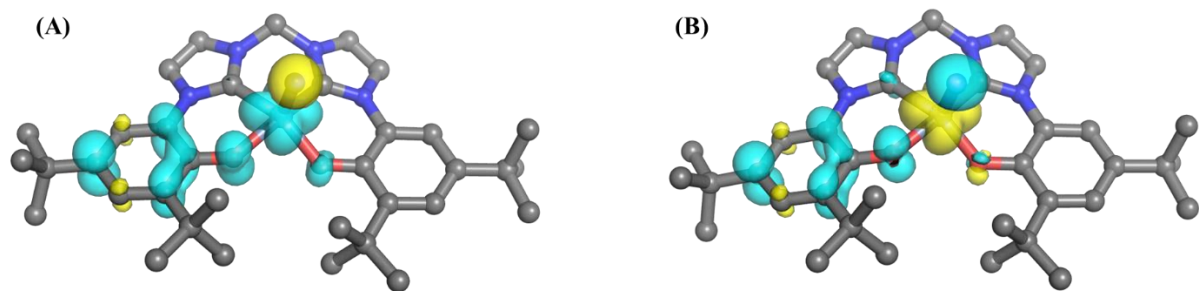

**Figure S22.** Spin density plots for (A) triplet  $[\text{CrL}^{\text{C}2\text{O}2}(\text{N})]^+$  and (B) broken symmetry  $[\text{CrL}^{\text{C}2\text{O}2}(\text{N})]^+$  electronic structures. See Experimental Section for calculation details.
